# Supplementary material
Source: publisher figshare collection journal article supplement (https://sage.figshare.com/ndownloader/files/22366296)
Supplement: Supplementary file 1 [file 22366296]

# Supplementary Material for

**Investigating the role of attention in the identification of associativity shortcuts using a microgenetic measure of implicit shortcut use**

Joanne Eaves, Camilla Gilmore, Nina Attridge

Table A1

Outcome of the equivalence tests and tests of statistical difference for median RT (s) after the IP. The data are from the 17, 19 and 25 identifiers in the control, left-prime and right-prime conditions respectively[[1]](#footnote-1).

| Problem type | Comparison | Mean (SD) | Equivalence test result | Statistical difference result | Interpretation (with alpha adjusted to *p*< 0.008) |
| --- | --- | --- | --- | --- | --- |
| Conducive | Control and left-prime | 5.37 (2.36) and 4.10 (2.24) | *t*(34) = 0.74, *p* = 0.232 | *t*(34) = 1.66, *p* = 0.107 | Not statistically equivalent or statistically different |
| Control and right-prime | 5.37 (2.36) and 5.88 (5.80) | *t(*40) = 2.20, *p* = 0.017 | *t(*40) = 0.34, *p* = 0.734 | Not statistically equivalent or statistically different |
| Left-prime and right-prime | 4.10 (2.24) and 5.88 (5.80) | *t*(42) = 1.36, *p* = 0.090 | *t*(42) = 1.27, *p* = 0.213 | Not statistically equivalent or statistically different |
| Non-conducive | Control and left-prime | 14.28 (7.12) and 9.99 (4.07) | *t*(34) = 0.15, *p* = 0.442 | *t*(34) = 2.25, *p* = 0.031 | Not statistically equivalent or statistically different |
| Control and right-prime | 14.28 (7.12) and 12.13 (5.80) | *t*(40) = 1.47, *p* = 0.075 | *t*(40) = 1.08, *p* = 0.289 | Not statistically equivalent or statistically different |
| Left-prime and right-prime | 9.99 (4.07) and 12.13 (5.80) | *t*(42) = 1.26, *p* = 0.108 | *t*(42) = 1.37, *p* = 0.178 | Not statistically equivalent or statistically different |

Table A2

Outcome of the equivalence tests and tests of statistical difference for solution accuracy (%) after the IP. The data are from the 17, 19 and 25 identifiers in the control, left-prime and right-prime conditions respectively.

| Problem type | Comparison | Mean (SD) | Equivalence test result | Statistical difference result | Interpretation (with alpha adjusted to *p*< 0.008) |
| --- | --- | --- | --- | --- | --- |
| Conducive | Control and left-prime | 91.76 (14.28) and 93.10 (9.67) | *t*(34) = 2.06, *p* = 0.023 | *t*(34) = 0.33, *p* = 0.74 | Not statistically equivalent or statistically different |
| Control and right-prime | 91.76 (14.28) and 97.18 (4.51) | *t*(40) = 0.76, *p* = 0.225 | *t*(40) = 1.78, *p* = 0.083 | Not statistically equivalent or statistically different |
| Left-prime and right-prime | 93.10 (9.67) and 97.18 (4.51) | *t*(23.95) = 0.82, *p* = 0.221 | *t*(23.95) = 1.70, *p* = 0.102 | Not statistically equivalent or statistically different |
| Non-conducive | Control and left-prime | 82.42 (18.82) and 78.54 (24.33) | *t*(34) = -1.87, *p* = 0.035 | *t*(34) = 0.53, *p* = 0.599 | Not statistically equivalent or statistically different |
| Control and right-prime | 82.42 (18.82) and 83.97 (12.85) | *t*(40) = 2.23, *p* = 0.016 | *t*(40) = 0.318, *p* = 0.752 | Not statistically equivalent or statistically different |
| Left-prime and right-prime | 78.54 (24.33) and 83.97 (12.85) | *t*(25.58) = 1.65, *p* = 0.056 | *t*(25.58) = 0.88, *p* = 0.385 | Not statistically equivalent or statistically different |

1. The equivalence test results in tables A1 and A2 were derived from a ‘TOSTER’ spreadsheet (see Lakens, 2017) [↑](#footnote-ref-1)
